# Supplementary material
Source: PubMed Central journal article supplement (PMC116676)
Supplement: 1471-2253-2-4-S1.pdf [file 1471-2253-2-4-S1.pdf]

## Additional file 1: search strategy

- #1 rofecoxib
- #2 viox
- #3 cox-2 selective inhibitor
- #3 specific cyclooxygenase-2 inhibitor
- #4 #1 OR #2 OR #3
- #5 analgesi\*
- #6 pain\*
- #7 postoperative
- #8 post-operative
- #9 surgical
- #10 postsurgical
- #11 post-surgical
- #12 dental
- #13 molar
- #14 extraction
- #15 #5 OR #6 OR #7 OR #8 OR #9 OR #10 OR #11 OR #12 OR #13 OR #14
- #16 random\*
- #17 double blind
- #18 double-blind
- #19 masked
- #20 clinical trial\*
- #21 trial\*
- #22 study\*
- #23 report\*
- #24 #16 OR #17 OR #18 OR #19 OR #20 OR #21 OR #22 OR #23
- #25 #4 AND #15 AND #24
