# Supplementary material
Source: PubMed Central journal article supplement (PMC116676)
Supplement: 1471-2253-2-4-S2.pdf [file 1471-2253-2-4-S2.pdf]

Additional file 2: Excluded studies

| Reference                                                                                                                                                                                                                                                                                              | Reason for exclusion                                                   |
|--------------------------------------------------------------------------------------------------------------------------------------------------------------------------------------------------------------------------------------------------------------------------------------------------------|------------------------------------------------------------------------|
| <b>Cox-2 inhibitors in focus: Rofecoxib as effective as the "classics".</b> <i>MMW Fortschr Med</i> 2001 Nov 15; 143(46):50-51                                                                                                                                                                         | Review, not clinical trial                                             |
| JS Gimbe, A Brugger, W Zhao, K M Verburg and GS Geis: <b>Efficacy and tolerability of celecoxib versus hydrocodone/acetaminophen in the treatment of pain after ambulatory orthopedic surgery in adults.</b> <i>Clin Ther</i> 2001 23(2):228-241                                                       | Not rofecoxib                                                          |
| JJ Huang, A Taguchi, H Hsu, GL Andriole and A Kurz: <b>Preoperative oral rofecoxib does not decrease postoperative pain or morphine consumption in patients after radical prostatectomy: a prospective, randomized, double-blinded, placebo-controlled trial.</b> <i>J Clin Anesth</i> 200113(2):94-97 | Study drug administration before operation, no baseline pain intensity |
| AH Jeske: <b>COX-2 inhibitors and dental pain control.</b> <i>J Gt Houst Dent Soc</i> 1999 71(4):39-40                                                                                                                                                                                                 | Review, not clinical trial                                             |
| BW Morrison, SE Daniels, P Kotey, N Cantu and B Seidenberg: <b>Rofecoxib, a specific cyclooxygenase-2 inhibitor, in primary dysmenorrhea: a randomized controlled trial.</b> <i>Obstet Gynecol</i> 1999 94(4):504-508                                                                                  | Not postoperative pain                                                 |
| BW Morrison, J Fricke, J Brown, W Yuan, P Kotey and D Mehlisch: <b>The optimal analgesic dose of rofecoxib: Overview of six randomized controlled trials.</b> <i>J Am Dent Assoc</i> 2000 131(12):1729-1737                                                                                            | Review, no identifiable unique trial data                              |
| AE Pickering, HS Bridge, J Nolan, PA Stoddart: <b>Double-blind, placebo-controlled analgesic study of ibuprofen or rofecoxib in combination with paracetamol for tonsillectomy in children.</b> <i>Br J Anaesth</i> 2002 88(1):72-77                                                                   | Children, not adult                                                    |
| SS Reuben, S Bhopatkar, H Maciolek, W Joshi, and J Sklar: <b>The preemptive analgesic effect of rofecoxib after ambulatory arthroscopic knee surgery.</b> <i>Anesth Analg</i> 2002 94(1):55-59                                                                                                         | Immediate postoperative administration before established pain         |
| SS Reuben and NR Connelly: <b>Postoperative analgesic effects of celecoxib or rofecoxib after spinal fusion surgery.</b> <i>Anesth Analg</i> 2000 91(5):1221-1225                                                                                                                                      | Concurrent morphine administration                                     |
| SS Reuben, R Fingerroth, R Krushell, H Maciolek: <b>The evaluation of safety and efficacy of the perioperative administration of rofecoxib for total knee arthroplasty.</b> <i>J Arthroplasty</i> 2002 17: 26-31                                                                                       | Not single dose analgesic trial, with 3-day use before surgery         |
| DO Stichtenoth and JC Frolich: <b>Therapy with preferential and specific COX-2 inhibitors.</b> <i>Internist</i> 2001 42(3):421-426                                                                                                                                                                     | Review, not clinical trial                                             |
| RL Wynn: <b>The new COX-2 inhibitors: rofecoxib (Vioxx) and celecoxib (Celebrex).</b> <i>Gen Dent</i> . 2000 48(1):16-20                                                                                                                                                                               | Review, not clinical trial                                             |
