# Supplementary material
Source: PubMed Central journal article supplement (PMC116676)
Supplement: 1471-2253-2-4-S3.pdf [file 1471-2253-2-4-S3.pdf]

Additional file 3: Details of included studies

| Reference             | Design                                                                                                                                           | Doses and number                                                                           | Outcomes                                                                                                                                                            | Analgesic results                                                                                                                                                                                                                                                                                                                                                                                                       | Adverse events                                                                                                                                                                                                                                                                                                                                                                                   | Quality score                           |
|-----------------------|--------------------------------------------------------------------------------------------------------------------------------------------------|--------------------------------------------------------------------------------------------|---------------------------------------------------------------------------------------------------------------------------------------------------------------------|-------------------------------------------------------------------------------------------------------------------------------------------------------------------------------------------------------------------------------------------------------------------------------------------------------------------------------------------------------------------------------------------------------------------------|--------------------------------------------------------------------------------------------------------------------------------------------------------------------------------------------------------------------------------------------------------------------------------------------------------------------------------------------------------------------------------------------------|-----------------------------------------|
| Ehrich et al, 1999    | Randomised, double blind, placebo control in postoperative third molar extraction                                                                | Placebo, n=32<br>Rofecoxib 50 mg, n=32<br>Rofecoxib 500 mg, n=20<br>Ibuprofen 400 mg, n=20 | Standard categorical pain intensity and relief scales, remedication time, adverse events. Review converts TOTPAR to at least 50% pain relief using standard methods | At least 50% pain relief:<br>Placebo 2/32<br>Rofecoxib 50 mg 21/32<br>Rofecoxib 500 mg 15/20<br>Ibuprofen 400 mg 14/20<br>Remedication within 2 hours:<br>75% of placebo<br><25% of rofecoxib 50 mg<br><25% of rofecoxib 500 mg<br><25% of ibuprofen 400 mg                                                                                                                                                             | Adverse events were reported as mild and transient, with headache and nausea most frequent. No details reported                                                                                                                                                                                                                                                                                  | R = 1<br>DB = 2<br>W/D = 1<br>Total = 4 |
| Malmstrom et al, 1999 | Randomised, double blind, placebo and active control in postoperative third molar extraction                                                     | Placebo, n=45<br>Rofecoxib 50 mg, n=90<br>Celecoxib 200 mg, n=91<br>Ibuprofen 400 mg, n=46 | Standard categorical pain intensity and relief scales, remedication time, adverse events. Review converts TOTPAR to at least 50% pain relief using standard methods | At least 50% pain relief:<br>Placebo 3/45<br>Rofecoxib 50 mg 59/90<br>Celecoxib 200 mg 37/91<br>Ibuprofen 400 mg 30/46<br>Remedication within 24 hours:<br>91% of placebo<br>49% of rofecoxib 50 mg<br>78% of celecoxib 200 mg<br>76% of ibuprofen 400 mg<br>Median time to remedication:<br>1.5 hours for placebo<br>>24 hours for rofecoxib 50 mg<br>5.1 hours for celecoxib 200 mg<br>8.9 hours for ibuprofen 400 mg | No persistent or unexpected adverse events.<br>Specific adverse events:<br>Nausea -<br>Placebo 9/45<br>Rofecoxib 50 mg 8/90<br>Celecoxib 200 mg 11/91<br>Ibuprofen 400 mg 8/46<br>Vomiting -<br>Placebo 6/45<br>Rofecoxib 50 mg 1/90<br>Celecoxib 200 mg 3/91<br>Ibuprofen 400 mg 4/46<br>Headache -<br>Placebo 6/45<br>Rofecoxib 50 mg 11/90<br>Celecoxib 200 mg 12/91<br>Ibuprofen 400 mg 4/46 | R = 2<br>DB = 2<br>W/D = 1<br>Total = 5 |
| Morrison et al, 1999  | Randomised, double blind, placebo and active control in postoperative third molar extraction                                                     | Placebo, n=50<br>Rofecoxib 50 mg, n=50<br>Ibuprofen 400 mg, n=51                           | Standard categorical pain intensity and relief scales, remedication time, adverse events. Review converts TOTPAR to at least 50% pain relief using standard methods | At least 50% pain relief:<br>Placebo 6/50<br>Rofecoxib 50 mg 22/50<br>Ibuprofen 400 mg 20/51<br>Remedication within 24 hours:<br>92% of placebo<br>56% of rofecoxib 50 mg<br>82% of ibuprofen 400 mg<br>Median time to remedication:<br>2.4 hours for placebo<br>9.5 hours for rofecoxib 50 mg<br>6.1 hours for ibuprofen 400 mg                                                                                        | Patients experiencing any adverse event:<br>Placebo 17/50<br>Rofecoxib 50 mg 6/50<br>Ibuprofen 400 mg 13/51<br>Nausea:<br>Placebo 9/50<br>Rofecoxib 50 mg 4/50<br>Ibuprofen 400 mg 8/51<br>Vomiting:<br>Placebo 7/50<br>Rofecoxib 50 mg 4/50<br>Ibuprofen 400 mg 5/52                                                                                                                            | R = 2<br>DB = 1<br>W/D = 1<br>Total = 4 |
| Chang et al, 2001     | Randomised, double blind, placebo and active control in postoperative third molar extraction                                                     | Placebo, n=31<br>Rofecoxib 50 mg, n=182<br>Paracetamol 600 mg plus codeine 60 mg, n=180    | Standard categorical pain intensity and relief scales, remedication time, adverse events. Review converts TOTPAR to at least 50% pain relief using standard methods | At least 50% pain relief:<br>Placebo 2/31<br>Rofecoxib 50 mg 104/182<br>Paracetamol 600 mg plus codeine 60 mg 49/180<br>Median time to remedication:<br>1.6 hours for placebo<br>9.6 hours for rofecoxib 50 mg<br>2.3 hours for paracetamol 600 mg plus codeine 60 mg                                                                                                                                                   | Patients experiencing any adverse event:<br>Placebo 10/31<br>Rofecoxib 50 mg 60/182<br>Paracetamol 600 mg plus codeine 60 mg 83/180<br>Nausea:<br>Placebo 3/31<br>Rofecoxib 50 mg 11/182<br>Paracetamol 600 mg plus codeine 60 mg 45/180<br>Vomiting:<br>Placebo 2/31<br>Rofecoxib 50 mg 7/182<br>Paracetamol 600 mg plus codeine 60 mg 33/180                                                   | R = 1<br>DB = 2<br>W/D = 1<br>Total = 4 |
| Reicin et al, 2001    | Randomised, double blind, placebo and active control in postoperative orthopaedic surgery. Single dose followed by multiple doses over five days | Placebo, n=53<br>Rofecoxib 50 mg, n=110<br>Naproxen sodium 550 mg, n=55                    | Standard categorical pain intensity and relief scales, adverse events. Review converts TOTPAR to at least 50% pain relief using standard methods                    | At least 50% pain relief after first dose:<br>Placebo 11/53<br>Rofecoxib 50 mg 52/110<br>Naproxen sodium 550 mg 25/55                                                                                                                                                                                                                                                                                                   | No single dose adverse event data reported.                                                                                                                                                                                                                                                                                                                                                      | R = 2<br>DB = 1<br>W/D = 1<br>Total = 4 |
